# Supplementary material for: Segmenting surface boundaries using luminance cues
Source: PubMed Central journal article supplement (PMC8115076; doi:10.1038/s41598-021-89277-2), 2021-05-12

## **SUPPLEMENTARY MATERIAL**

**TITLE:** “Segmenting surface boundaries using luminance cues”

**AUTHORS:** Christopher DiMattina <sup>1,\*</sup> & Curtis L. Baker, Jr.<sup>2</sup>

<sup>1</sup>Computational Perception Laboratory & Department of Psychology  
Florida Gulf Coast University, Fort Myers, FL, USA 33965-6565

<sup>2</sup>McGill Vision Research Unit, Department of Ophthalmology,  
McGill University, Montreal, QC, Canada H3G1A4

**TABLE S1**

|     | <b>BIC: Additive</b> |              | <b>BIC: Divisive</b> |              | <b>BIC<sub>D</sub> - BIC<sub>A</sub></b> |              |
|-----|----------------------|--------------|----------------------|--------------|------------------------------------------|--------------|
|     | <i>None</i>          | <i>Lapse</i> | <i>None</i>          | <i>Lapse</i> | <i>None</i>                              | <i>Lapse</i> |
| CJD | -427.510             | -430.820     | -419.665             | -423.020     | 7.845                                    | 7.800        |
| ERM | -448.073             | -451.383     | -438.469             | -441.779     | 9.605                                    | 9.605        |
| KNB | -424.487             | -427.797     | -411.348             | -414.658     | 13.139                                   | 13.139       |

**Table S1:** Bayes Information Criterion (BIC) for fits of Additive and Divisive SDT models to data from **Experiment 3**, with (*Lapse*) and without (*None*) lapse rates.

**TABLE S2**

| <b>Observer</b> | <b>neu</b>  | <b>con</b>  | <b>inc</b>  | <b><math>\chi^2</math></b> | <b><i>p</i></b>     |
|-----------------|-------------|-------------|-------------|----------------------------|---------------------|
| CJD             | 0.80        | 0.83        | 0.74        | 4.575                      | 0.102               |
| ERM             | 0.70        | 0.78        | 0.67        | 5.742                      | 0.057               |
| KNB             | 0.78        | 0.83        | 0.81        | 1.287                      | 0.525               |
| MCO             | 0.76        | 0.82        | 0.78        | 2.612                      | 0.271               |
| NRB             | 0.89        | 0.92        | 0.89        | 1.115                      | 0.573               |
| RCL             | 0.78        | 0.86        | 0.81        | 3.842                      | 0.146               |
| JCO             | 0.92        | 0.95        | 0.95        | 1.974                      | 0.373               |
| HAP             | 0.90        | 0.87        | 0.86        | 1.603                      | 0.449               |
| EMW             | 0.88        | 0.93        | 0.88        | 3.598                      | 0.166               |
| <b>POOLED</b>   | <b>0.82</b> | <b>0.86</b> | <b>0.82</b> | <b>15.319</b>              | <b>&lt;0.001***</b> |

\*  $p < 0.05$ , \*\*  $p < 0.01$ , \*\*\*  $p < 0.001$

**Table S2:** Statistical tests (Pearson's  $\chi^2$ ,  $df = 2$ ) of the hypothesis that the proportion correct ( $P_c$ ) is identical for the *neutral* (**neu**), *congruent* (**con**), and *incongruent* (**inc**) conditions of **Experiment 4a**.

**TABLE S3**

| <b>Observer</b> | <b>neu</b>  | <b>con-0</b> | $\chi^2$      | <i>p</i>            | <b>con-180</b> | $\chi^2$     | <i>p</i>     |
|-----------------|-------------|--------------|---------------|---------------------|----------------|--------------|--------------|
| CJD             | 0.80        | 0.90         | 4.800         | 0.028*              | 0.75           | 0.982        | 0.322        |
| ERM             | 0.70        | 0.83         | 5.905         | 0.015*              | 0.72           | 0.129        | 0.720        |
| KNB             | 0.78        | 0.84         | 1.500         | 0.221               | 0.81           | 0.362        | 0.548        |
| MCO             | 0.76        | 0.83         | 2.185         | 0.139               | 0.81           | 1.15         | 0.283        |
| NRB             | 0.89        | 0.96         | 4.579         | 0.032*              | 0.87           | 0.142        | 0.706        |
| RCL             | 0.78        | 0.86         | 2.736         | 0.098               | 0.85           | 2.068        | 0.150        |
| JCO             | 0.92        | 0.97         | 3.241         | 0.072               | 0.92           | 0.022        | 0.883        |
| HAP             | 0.90        | 0.88         | 0.280         | 0.597               | 0.86           | 1.061        | 0.303        |
| EMW             | 0.88        | 0.98         | 8.422         | 0.004**             | 0.88           | 0.000        | 1.000        |
| <b>POOLED</b>   | <b>0.82</b> | <b>0.89</b>  | <b>24.383</b> | <b>&lt;0.001***</b> | <b>0.83</b>    | <b>0.288</b> | <b>0.592</b> |

\*  $p < 0.05$ , \*\*  $p < 0.01$ , \*\*\*  $p < 0.001$

**Table S3:** Statistical comparisons (Pearson's  $\chi^2$ ,  $df = 1$ ) of observer performance in the neutral (**neu**) case of **Experiment 4a** with each sub-condition of the congruent trials: Aligned-phase (**con-0**) and opposite-phase (**con-180**).

**TABLE S4**

| <b>Observer</b> | <b>con-0</b> | <b>con-180</b> | <b><math>\chi^2</math></b> | <b><i>p</i></b>     |
|-----------------|--------------|----------------|----------------------------|---------------------|
| CJD             | 0.90         | 0.75           | 7.792                      | 0.005**             |
| ERM             | 0.83         | 0.72           | 3.470                      | 0.063               |
| KNB             | 0.84         | 0.81           | 0.312                      | 0.577               |
| MCO             | 0.83         | 0.81           | 0.136                      | 0.713               |
| NRB             | 0.96         | 0.87           | 5.207                      | 0.022*              |
| RCL             | 0.86         | 0.85           | 0.040                      | 0.841               |
| JCO             | 0.97         | 0.92           | 2.405                      | 0.121               |
| HAP             | 0.88         | 0.86           | 0.177                      | 0.674               |
| EMW             | 0.98         | 0.88           | 7.689                      | 0.006**             |
| <b>POOLED</b>   | <b>0.89</b>  | <b>0.83</b>    | <b>15.732</b>              | <b>&lt;0.001***</b> |

\*  $p < 0.05$ , \*\*  $p < 0.01$ , \*\*\*  $p < 0.001$

**Table S4:** Statistical tests (Pearson's  $\chi^2$ ,  $df = 1$ ) of the hypothesis that proportion correct is identical for phase-aligned (**con-0**) and opposite-phase (**con-180**) stimuli for the congruent case in **Experiment 4a**.

**TABLE S5**

| <b>Observer</b> | <b>isolated</b>         | <b>masked</b>           |
|-----------------|-------------------------|-------------------------|
| CJD             | 0.0041 [0.0035, 0.0055] | 0.0100 [0.0083, 0.0165] |
| KNB             | 0.0043 [0.0039, 0.0048] | 0.0083 [0.0072, 0.0098] |
| MXD             | 0.0056 [0.0048, 0.0066] | 0.0113 [0.0094, 0.0170] |

**Table S5:** Median LSB segmentation thresholds and non-parametric 95% confidence intervals (200 bootstraps) when the LSB is presented in isolation (**isolated**) and in the presence of an uninformative LTB masker (**masked**) having no boundary (equal number of B and W micro-patterns on each side). We see slightly higher LSB segmentation thresholds in the presence of the uninformative LTB masker, rising from about 0.5% to 1% Michelson Contrast.

**TABLE S6**

| <b>Observer</b> | <b>neu</b>  | <b>con</b>  | <b>inc</b>  | <b><math>\chi^2</math></b> | <b><i>p</i></b> |
|-----------------|-------------|-------------|-------------|----------------------------|-----------------|
| CJD             | 0.87        | 0.83        | 0.73        | 13.189                     | 0.001**         |
| KNB             | 0.86        | 0.85        | 0.83        | 0.933                      | 0.627           |
| MXD             | 0.90        | 0.90        | 0.87        | 0.829                      | 0.661           |
| <b>POOLED</b>   | <b>0.88</b> | <b>0.86</b> | <b>0.81</b> | <b>10.786</b>              | <b>0.005**</b>  |

\*  $p < 0.05$ , \*\*  $p < 0.01$ , \*\*\*  $p < 0.001$

**Table S6:** Statistical tests (Pearson's  $\chi^2$ ,  $df = 2$ ) of the hypothesis that the proportion correct ( $P_c$ ) is identical for the *neutral* (**neu**), *congruent* (**con**), and *incongruent* (**inc**) conditions of **Experiment 4b**.

**TABLE S7**

| <b>Observer</b> | <b>neu</b>  | <b>con-0</b> | $\chi^2$     | <i>p</i>      | <b>con-180</b> | $\chi^2$      | <i>p</i>            |
|-----------------|-------------|--------------|--------------|---------------|----------------|---------------|---------------------|
| CJD             | 0.87        | 0.95         | 4.605        | 0.032*        | 0.70           | 12.69         | <0.001***           |
| KNB             | 0.86        | 0.89         | 0.531        | 0.466         | 0.80           | 1.786         | 0.181               |
| MXD             | 0.90        | 0.94         | 1.648        | 0.199         | 0.85           | 1.278         | 0.258               |
| <b>POOLED</b>   | <b>0.88</b> | <b>0.93</b>  | <b>5.552</b> | <b>0.018*</b> | <b>0.78</b>    | <b>12.794</b> | <b>&lt;0.001***</b> |

\*  $p < 0.05$ , \*\*  $p < 0.01$ , \*\*\*  $p < 0.001$

**Table S7:** Statistical comparisons (Pearson's  $\chi^2$ ,  $df = 1$ ) of observer performance in the neutral (**neu**) case of **Experiment 4b** with each sub-condition of the congruent trials: aligned-phase (**con-0**) and opposite-phase (**con-180**).



**TABLE S8**

| <b>Observer</b> | <b>con-0</b> | <b>con-180</b> | <b><math>\chi^2</math></b> | <b><i>p</i></b>     |
|-----------------|--------------|----------------|----------------------------|---------------------|
| CJD             | 0.95         | 0.70           | 21.645                     | <0.001***           |
| KNB             | 0.89         | 0.80           | 3.092                      | 0.079               |
| MXD             | 0.94         | 0.85           | 4.310                      | 0.038*              |
| <b>POOLED</b>   | <b>0.93</b>  | <b>0.78</b>    | <b>24.857</b>              | <b>&lt;0.001***</b> |

\*  $p < 0.05$ , \*\*  $p < 0.01$ , \*\*\*  $p < 0.001$

**Table S8:** Statistical tests (Pearson's  $\chi^2$ ,  $df = 1$ ) of the hypothesis that proportion correct is identical for phase-aligned (**con-0**) and opposite-phase (**con-180**) stimuli for the congruent case in **Experiment 4b**.

**TABLE S9**

| <b>Observer</b> | <b>BIC<sub>1</sub></b> | <b>BIC<sub>2</sub></b> | <b>BIC<sub>2</sub> – BIC<sub>1</sub></b> | <b>IE ratio</b> | <b>DC response</b> |
|-----------------|------------------------|------------------------|------------------------------------------|-----------------|--------------------|
| CJD             | -334.993               | -316.758               | 18.235                                   | 0.00            | 26.7473            |
| ERM             | -375.381               | -367.651               | 7.730                                    | 0.20            | 8.8932             |
| KNB             | -344.449               | -309.400               | 35.049                                   | 0.25            | 4.4296             |
| MCO             | -353.603               | -325.880               | 27.723                                   | 0.30            | -0.0339            |
| NRB             | -277.090               | -208.152               | 68.938                                   | 0.30            | -0.0339            |
| RCL             | -312.702               | -299.927               | 12.775                                   | 0.25            | 4.4296             |
| JCO             | -161.696               | -156.019               | 5.6770                                   | 0.05            | 22.2837            |
| HAP             | -273.753               | -236.640               | 37.113                                   | 0.20            | 8.8932             |
| EMW             | -267.175               | -208.309               | 58.866                                   | 0.30            | -0.0339            |

**Table S9:** Bayes Information Criteria (BIC) for model fits to data from **Experiment 4a**, for both one-stage (**BIC<sub>1</sub>**) and two-stage (**BIC<sub>2</sub>**) models. The two rightmost columns show the optimal values of the IE ratio for the first-stage filters in the two-stage model, as well as the DC response of this first-stage filter to uniform unit luminance.

**TABLE S10**

| <b>Observer</b> | <b>BIC<sub>1</sub></b> | <b>BIC<sub>2</sub></b> | <b>BIC<sub>2</sub> – BIC<sub>1</sub></b> | <b>IE ratio</b> | <b>DC response</b> |
|-----------------|------------------------|------------------------|------------------------------------------|-----------------|--------------------|
| CJD             | -320.289               | -287.982               | 32.307                                   | 0.05            | 22.2837            |
| KNB             | -318.614               | -270.836               | 47.778                                   | 0.25            | 4.4296             |
| MXD             | -287.426               | -222.493               | 64.933                                   | 0.20            | 8.8932             |

**Table S10:** Same as **Table S9** but for **Experiment 4b**.

## SUPPLEMENTARY FIGURE CAPTIONS

### **Figure S1: Effects of density on LTB segmentation thresholds**

Effects of micro-pattern density on segmentation thresholds for experienced observers (author CJD and naïve observers KNB, ERM). Plotted are means (circles) and 1 SEM (lines) obtained from  $N = 200$  bootstrapped fits of the SDT psychometric function. We see that thresholds are slightly higher for 16 micro-patterns, and that similar performance is obtained for 32 and 64 micro-patterns.

### **Figure S2: Thresholds estimated with and without lapse rates**

(a) Thresholds from **Experiment 1a**. We see nearly identical threshold estimates whether or not lapse rates are included in our PF definitions. (b) Thresholds from **Experiment 1b**.

### **Figure S3: Contrast thresholds for LSB segmentation**

(a) Fits of SDT psychometric function to LSB segmentation performance for same observers shown in **Fig. 3a**. (b) Histogram of threshold for all observers.

### **Figure S4: Fits of one-stage model to LSB segmentation performance**

Same as **Fig. 4b** in main text, but shows fits of the one-stage model to LSB segmentation data from **Experiment 1b**.

**Figure S5: Fits of additive and divisive one-stage model**

(a) Same as **Fig. 6b**, but with lapse rates estimated. (b) Divisive model fit to **Experiment 3** data accurately predicts performance in **Experiment 2**.

**Figure. S6: Fits of models to Experiment 4a data**

Same as **Fig. 8b** in main text, but for remaining observers.

**Fig S7: Fits of the two-stage model (Fig. 8a) to Experiment 3 data**

Fits of both additive and divisive instances of the two-stage model shown in **Fig. 8a** to psychophysical data obtained in **Experiment 3**. As with the one-stage model (**Fig. 6**), we find much better fits with the divisive two-stage model.

**Fig S8: Results from Experiment 4b**

(a) Same as **Fig. 7a** in main text for **Experiment 4b**.

(b) Same as **Fig. 7b** in main text for **Experiment 4b**.

(c) Same as **Fig. 8b** in main text for **Experiment 4b**.

Supplementary Fig. S1

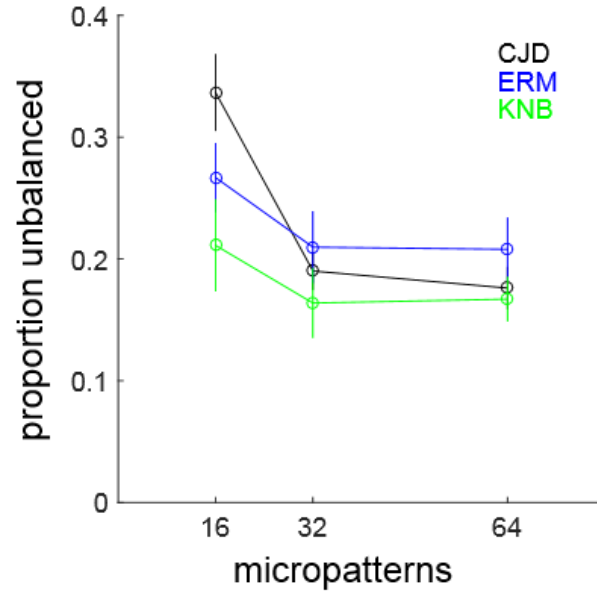

Supplementary Fig. S2

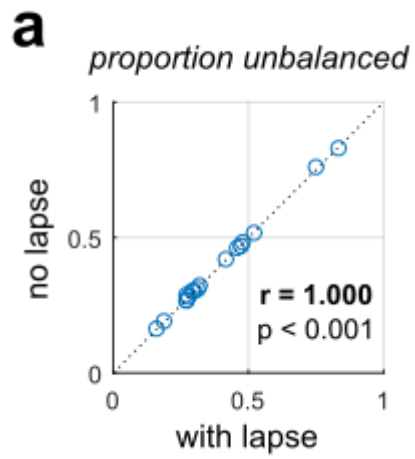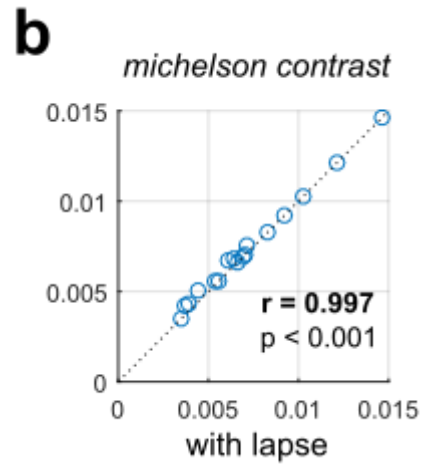

Supplementary Fig. S3

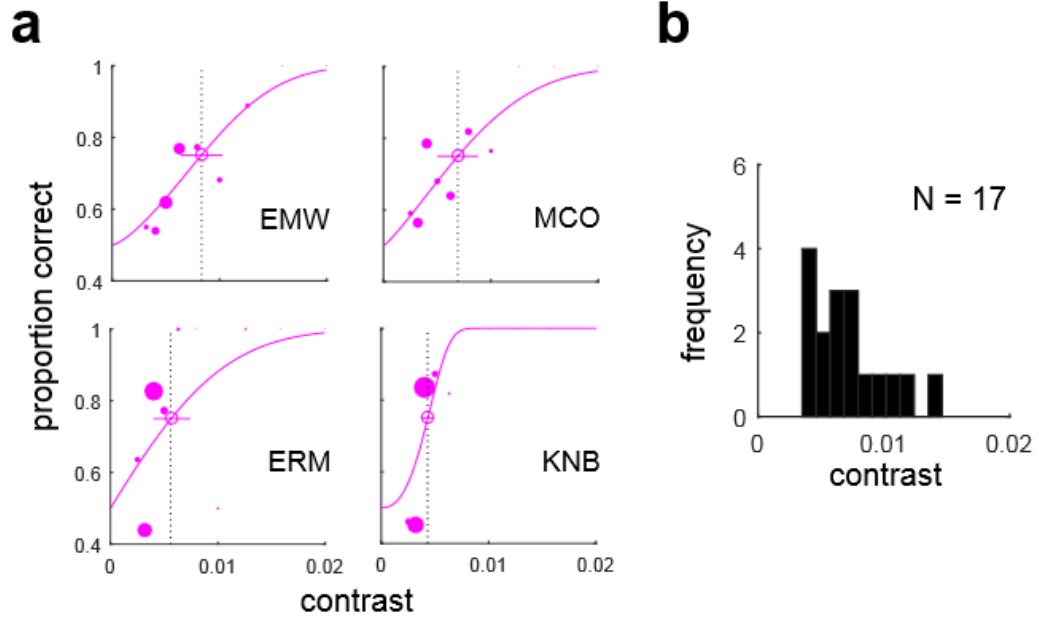



Supplementary Fig. S4

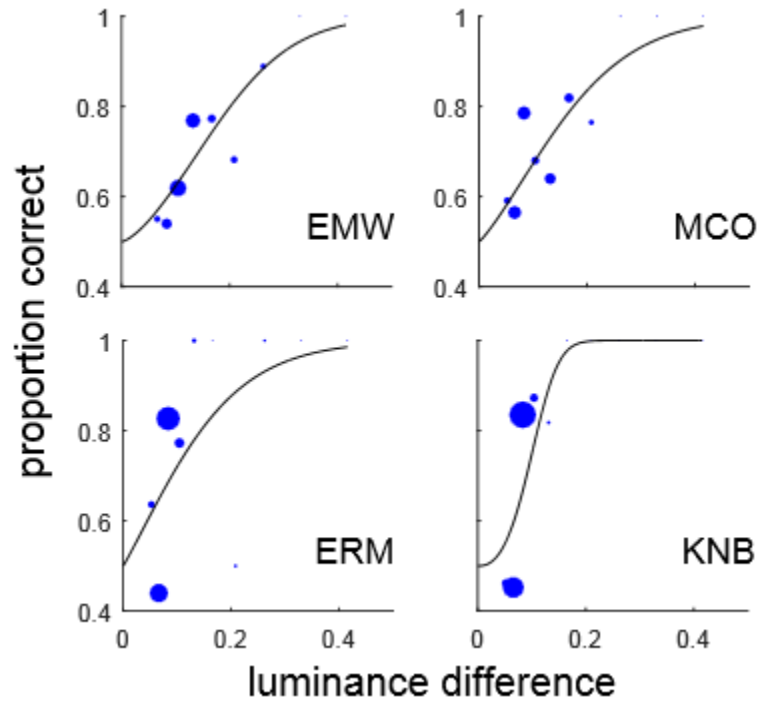

Supplementary Fig. S5

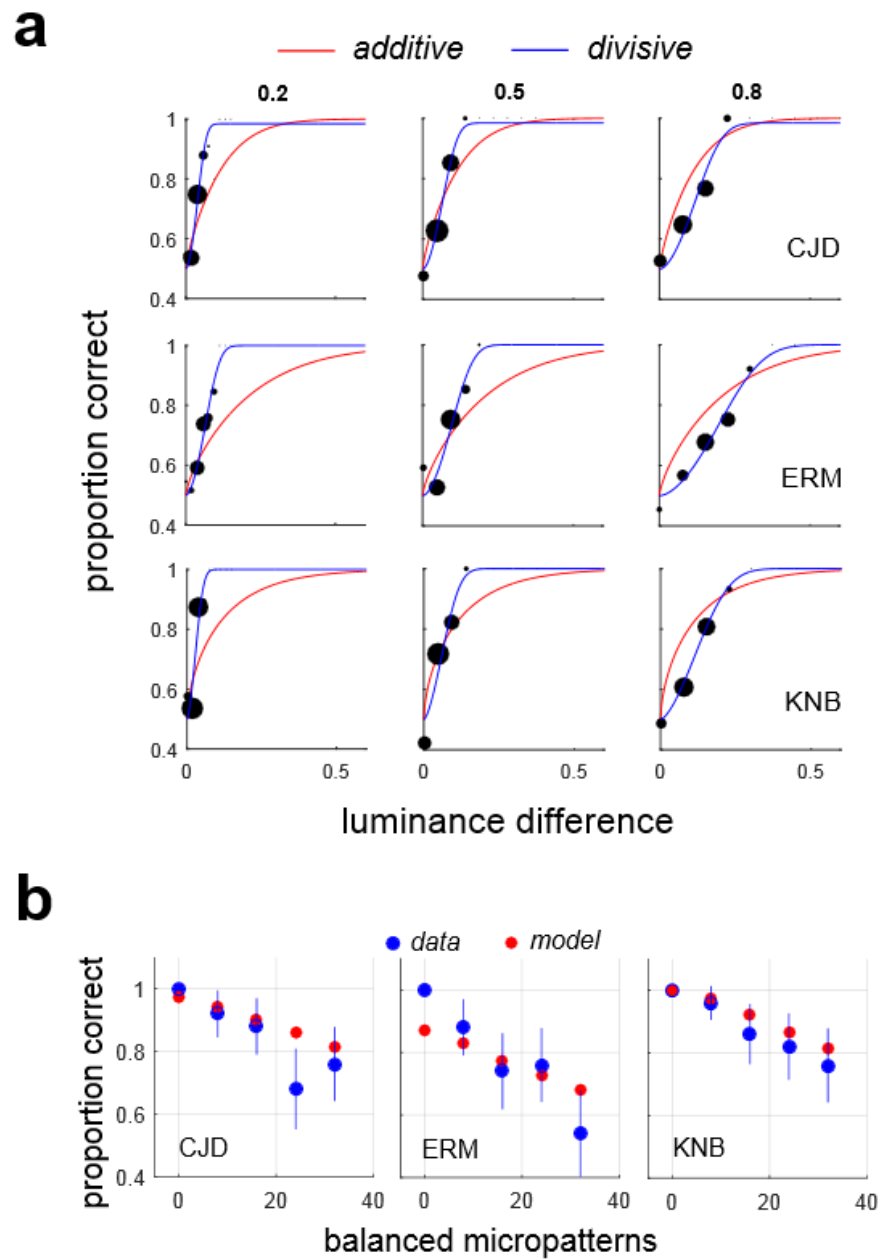

Supplementary Fig. S6

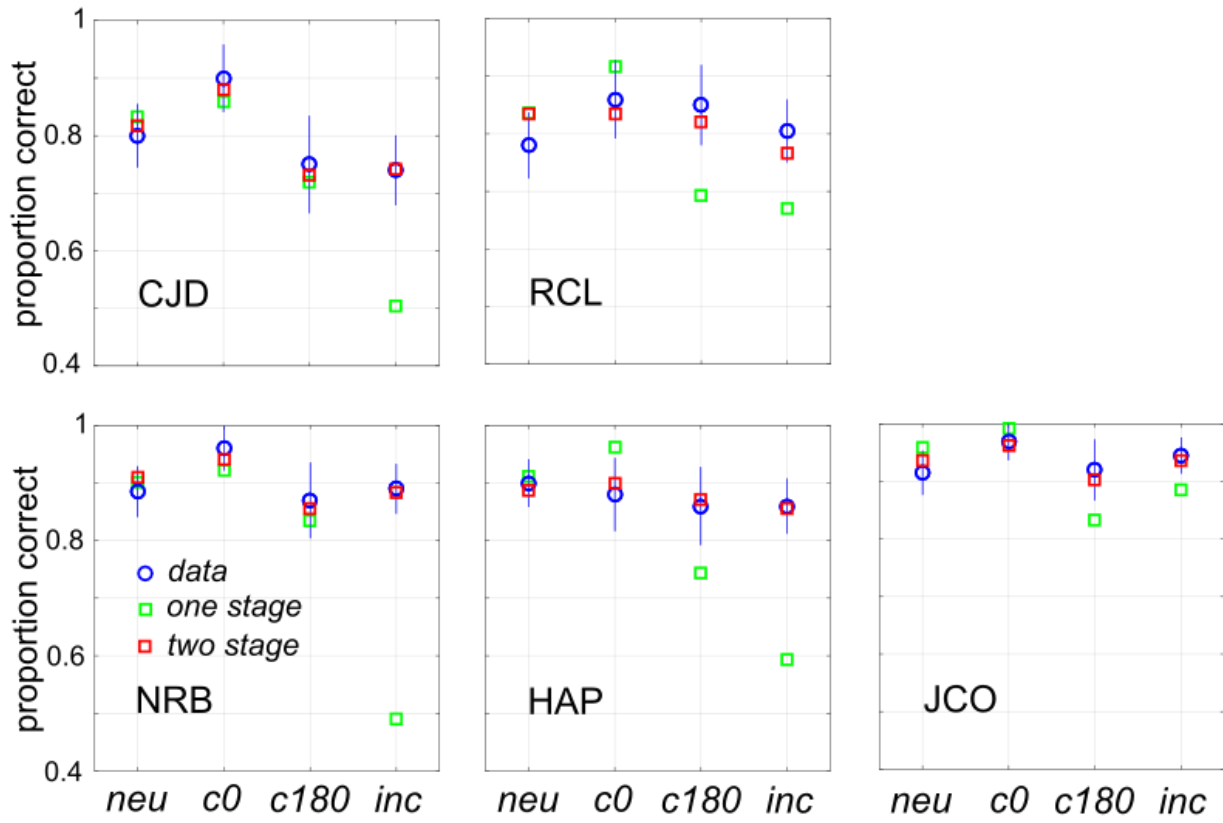

Supplementary Fig. S7

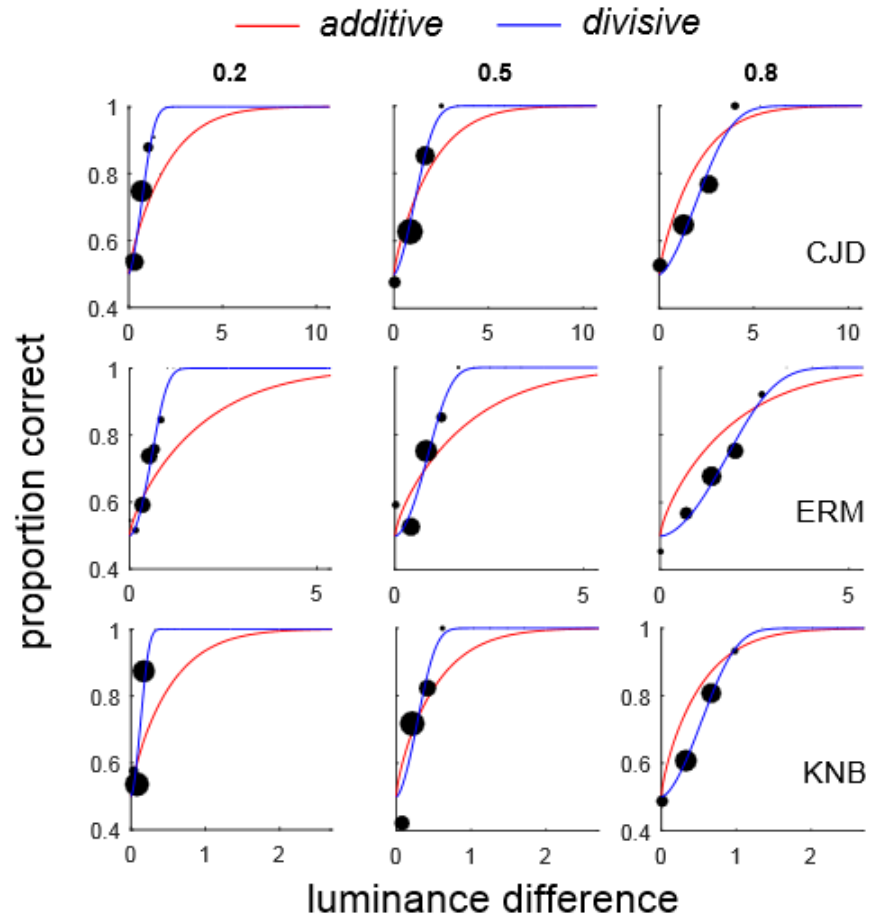

Supplementary Fig. S8

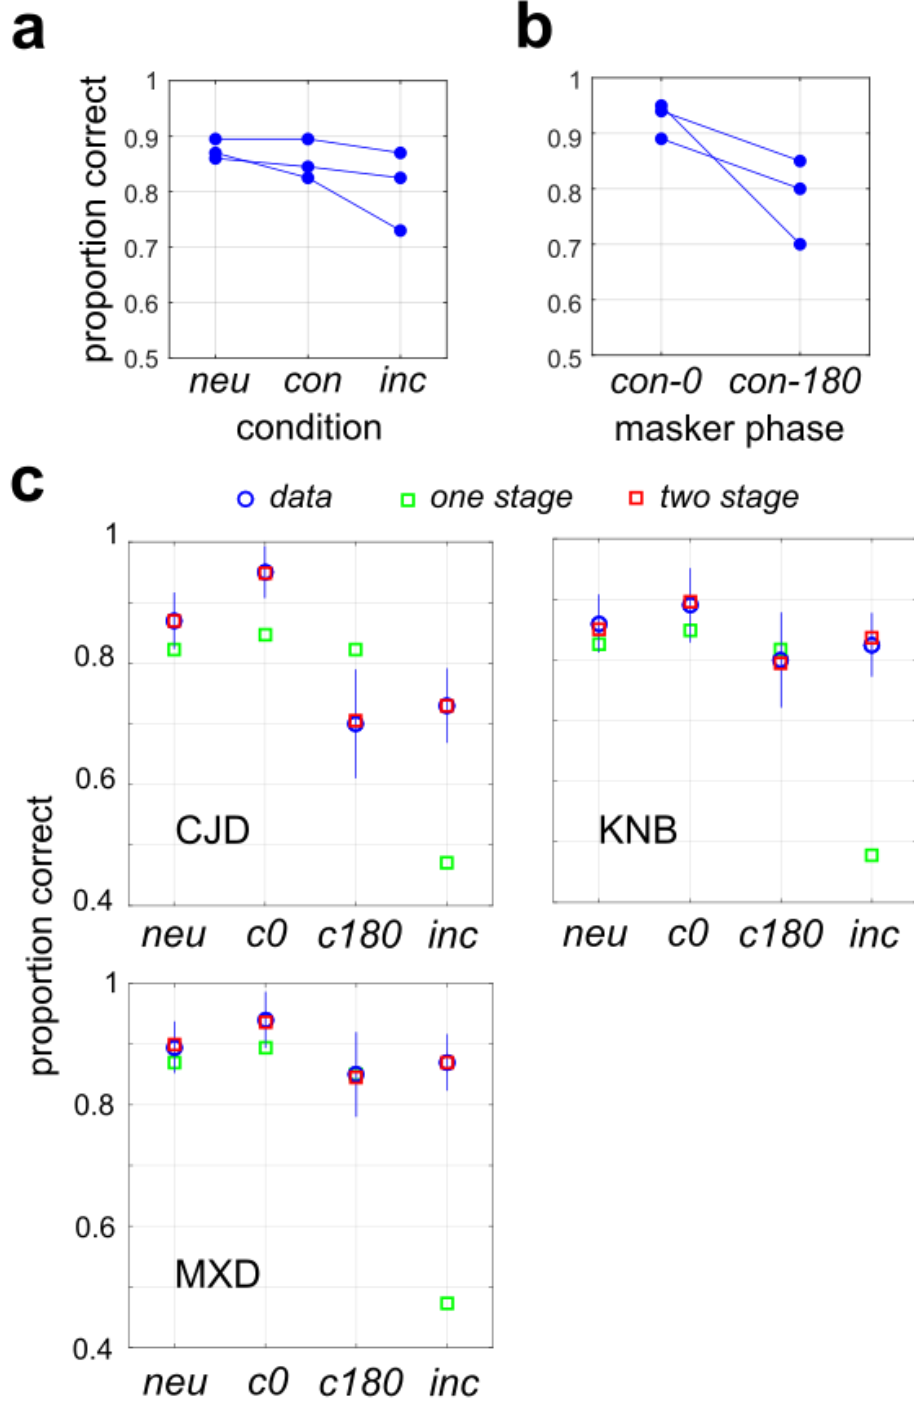

Supplement: 41598_2021_89277_MOESM1_ESM.pdf [file 41598_2021_89277_MOESM1_ESM.pdf]
